# Supplementary material for: Up Regulation in Transcript Abundance of Plastidic Isoforms of Antioxidant Enzymes and Accumulation of Compatible Osmolytes Impart Tissue Tolerance to Salinity Stressed Wheat Plants
Source: Preprints.org preprint supplement (doi:10.20944/preprints202103.0742.v1), 2021-03-30
Supplement: Supplementary file 1 [file 4. 1Supplementary files1.docx]

| **Name** | **Sequence** |
| --- | --- |
| Ta- Cu/Zn-SODc -F | CAG AGC ATC ACC CAT TCA TCA TC |
| Ta- Cu/Zn-SODc -R | CAG TGA TAA AGT TCA GAG TAG CAC |
| Ta- Cu/Zn-SODp -F | TCC GAA TTG TCT CCA CTC CAG GA |
| Ta-Cu/Zn-SODp -R | TCA CGC TTC ATA GCT CAA CAA GAC |
| Ta-MnSOD-F | ACC TAC GTC GCC AAC TAC AAC AAG |
| Ta-MnSOD-R | TGT TCA CCA CCT TCC GGA TGT TG |
| Ta-FeSOD-F | GTC TGG AAC CAT CAC TTC TTC TG |
| Ta-FeSOD-R | TCC GTC TCA TCC AGT AGG ATG TG |
| Ta-CAT-F | CAC ATG TTC ACC TTC CTC TTC GA |
| Ta-CAT-R | TCC TTC TCG ATC ACC ATC TTC TC |
| Ta-APX-F | GAG GAC ATC AAG GAG ATC CTC A |
| Ta-APX-R | CAT CAA ATA GTG CAG CAT CTG TAG |
| Ta-ACT-F | CTT GAT TAT GAG CAG GAG CTG GA |
| Ta-ACT-R | GAT CTC TTT GCT CAT GCG ATC AG |
| *TPS*-F | GTA CTA TGT CAT TGC AGA GGT GTG |
| *TPS*-R | CAC AAG CTG TTG AGT ATC TGG AC |
| *TPP*-F | CAT CAG TGA TCC GAT GTC AAT GAG |
| *TPP*-R | GAA ACC TCA TCG ATC ATA GGC AG |
| *BADH*-F | GTG AAC CAG AAC AAG GAG GAT AG |
| *BADH*-R | CCA CTG AAG ATA CAA GAG CTT GAC |
| *P5CS*-F | CAT GAT GAT GTC ATT GAT CTT GTC |
| *P5CS*-R | GTG TAC TCA ACA TCC TTG TCA C |

**Supplementary file1**

**Primer sequence of the genes used for RTPCR**
